# Supplementary material for: Akebia Saponin D Inhibits the Inflammatory Reaction by Inhibiting the IL-6-STAT3-DNMT3b Axis and Activating the Nrf2 Pathway
Source: MDPI journal article supplement (doi:10.3390/molecules27196236), 2022-09-22
Supplement: s1 [file s1]

This document certifies that the manuscript

**Akebia Saponin D inhibits inflammatory reaction through in-hibiting IL-6-STAT3-DNMT3b axis and activating Nrf2 path-way**

prepared by the authors

**Jin-Fang Luo, Chon-Kit Lio and Hua Zhou**

was edited for proper English language, grammar, punctuation, spelling, and overall style by one or more of the highly qualified native English speaking editors at AJE.

This certificate was issued on **August 16, 2022** and may be verified on the [AJE website](https://aje.com) using the verification code **2A9B-63DA-0775-E741-3DF8**.

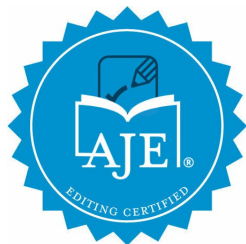

Neither the research content nor the authors' intentions were altered in any way during the editing process. Documents receiving this certification should be English-ready for publication; however, the author has the ability to accept or reject our suggestions and changes. To verify the final AJE edited version, please visit our verification page at [aje.com/certificate](https://aje.com/certificate). If you have any questions or concerns about this edited document, please contact AJE at [support@aje.com](mailto:support@aje.com).
