# Supplementary figures and images for: Akebia Saponin D Inhibits the Inflammatory Reaction by Inhibiting the IL-6-STAT3-DNMT3b Axis and Activating the Nrf2 Pathway
Source: MDPI journal article supplement (doi:10.3390/molecules27196236), 2022-09-22

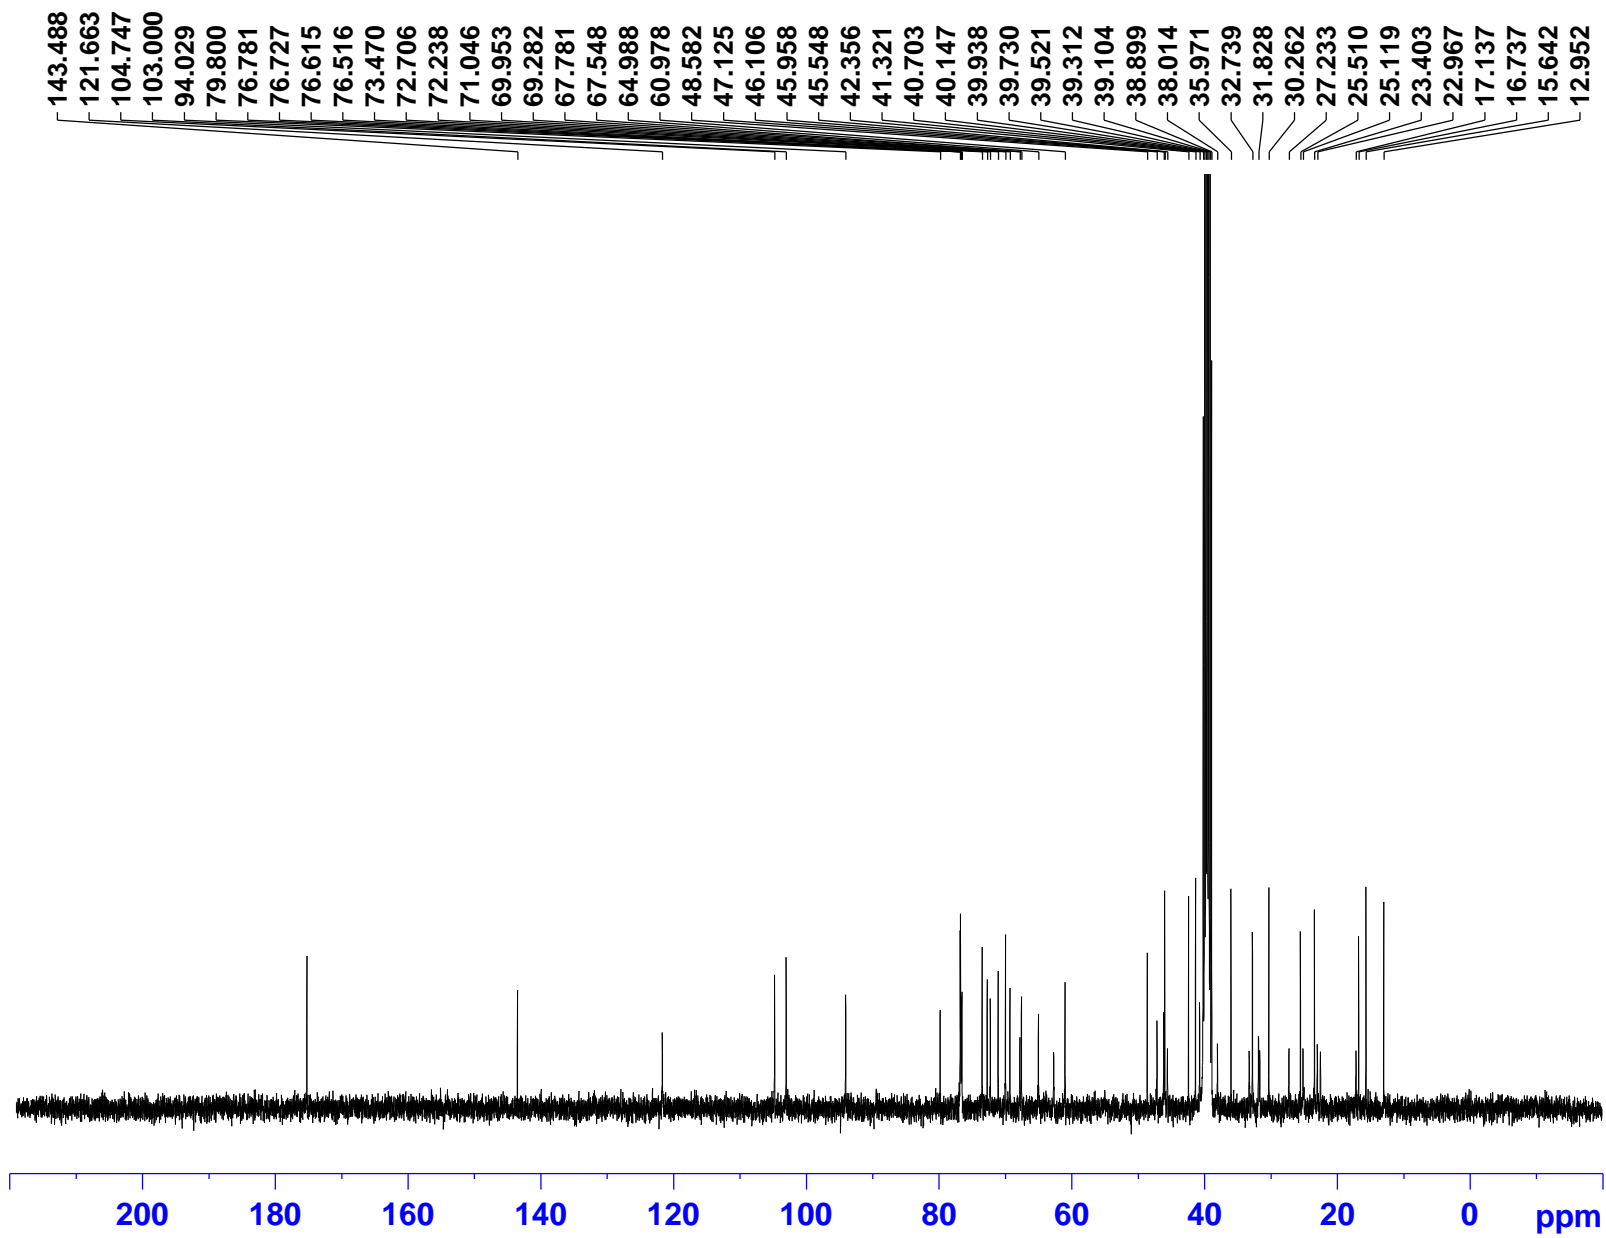

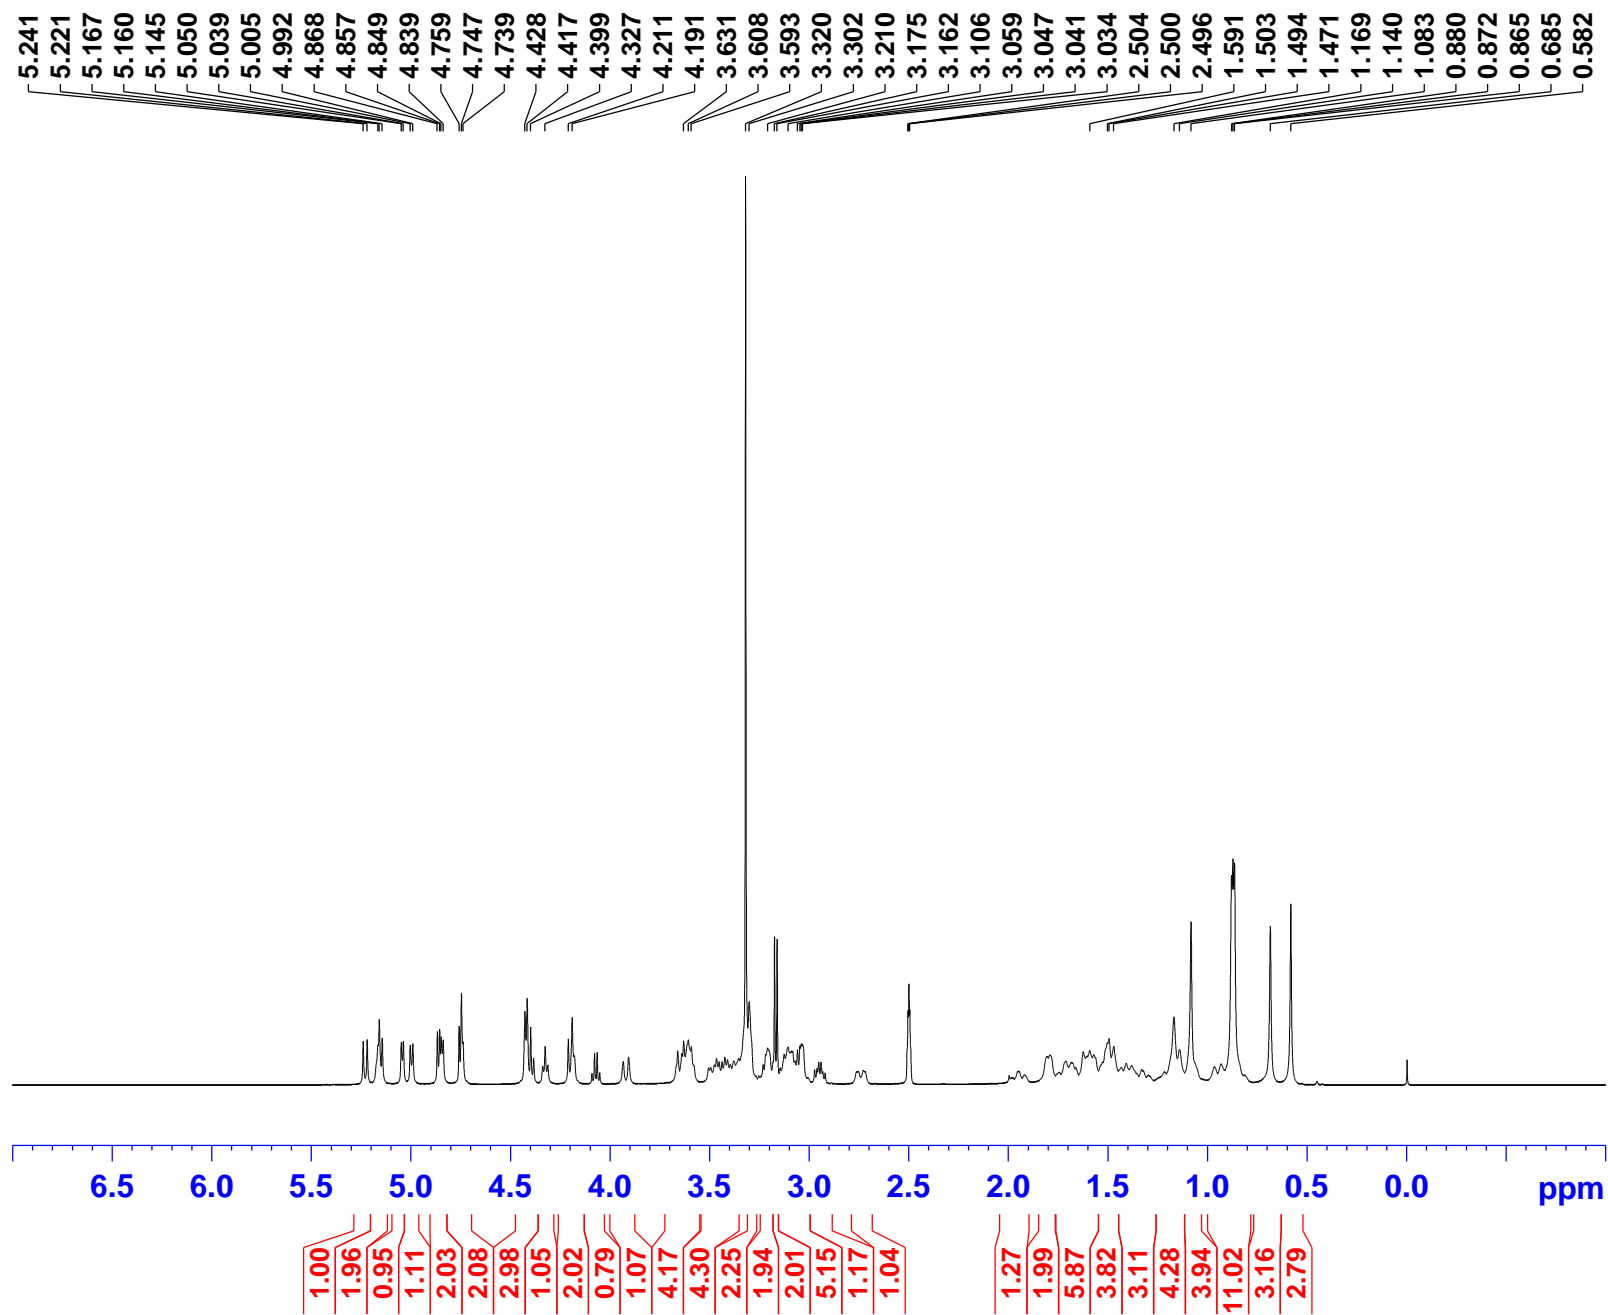

Supplement: s1 [file s1]
